# Supplementary material for: Intracellular Delivery of Anti-SMC2 Antibodies against Cancer Stem Cells
Source: MDPI journal article supplement (doi:10.3390/pharmaceutics12020185), 2020-02-21
Supplement: s1 [file s1]

# Supplementary Materials: Intracellular Delivery of Anti-SMC2 antibodies Against Cancer Stem Cells

Sara Montero, Joaquin Seras-Franzoso, Fernanda Andrad, Francesc Martinez-Trucharte, Mireia Vilar-Hernández, Manuel Quesada, Helena Xandri, Diego Arango, Ibane Abasolo, Diana Rafael and Simó Schwartz Jr.

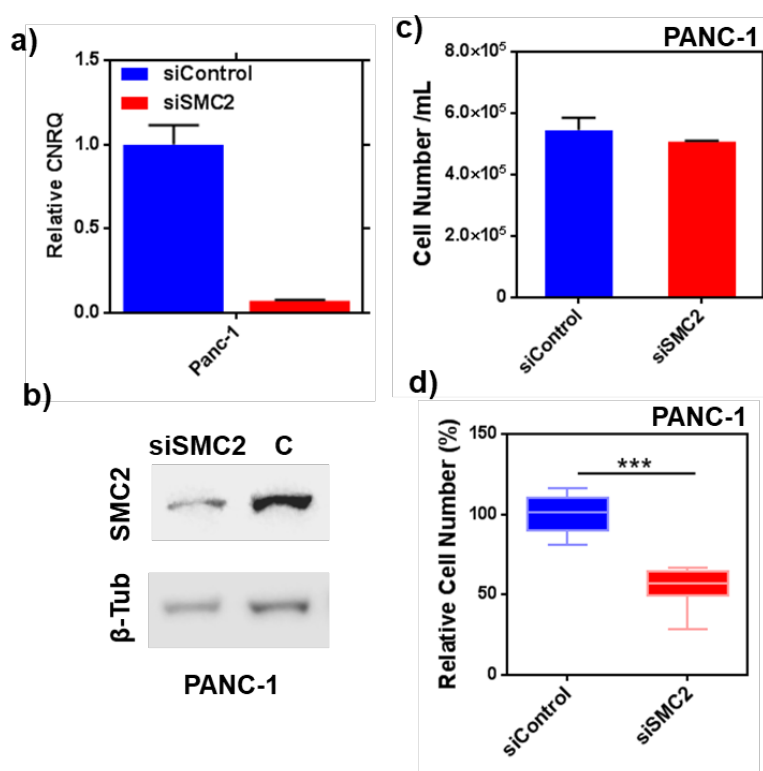

**Figure S1. SMC2 therapeutic target validation.** a) Relative mRNA levels after SMC2 silencing for PANC-1 pancreatic cancer cell line (siSMC2). Fold change was represented with respect to mRNA levels obtained from non-specific siRNA sequence treated cells (siControl); b) SMC2 and beta-tubulin proteins detected by western blot after SMC2 silencing compared to siControl treated cells (C); c) Cell viability assay for PANC-1 adherent cells after treatment with siSMC2 and siControl; d) Relative cell number percentage for PANC-1 cells growing in non-adherent conditions treated with siSMC2 and siControl.

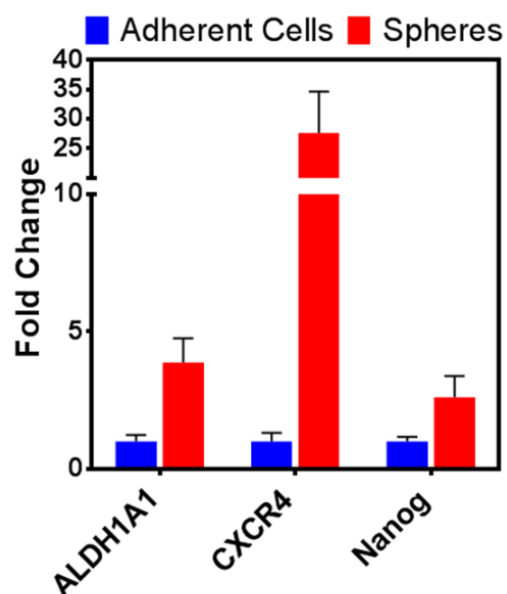

**Figure S2.** Stemness gene expression of HCT116 cell line growing in adherent cell culture or as tumorspheres (non-attachment). Fold change in gene expression for cells growing as tumorspheres (red bars) are represented with respect to mRNA levels obtained for adherent cells (blue bars). Stemness genes in colon cancer: ALDH1A1, CXCR4 and Nanog were analyzed using GAPDH and  $\beta$ -Actin as housekeeping references.

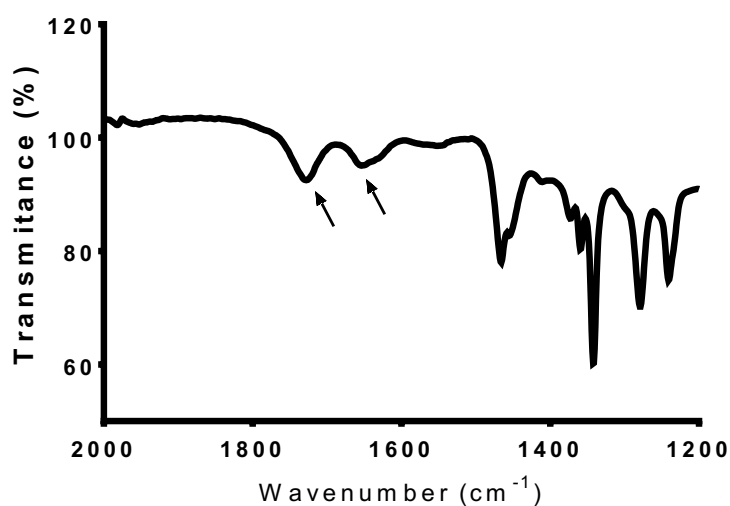

**Figure S3:** FTIR spectra for PM-CON:SMC2 at 100% -COOH. A peak displayed at 1728  $\text{cm}^{-1}$  correspond to the -C=O stretching of the -COOH groups and a peak at 1653  $\text{cm}^{-1}$  correspond to the C=O stretching vibrations of the peptide bond of the amide I.

**a) HCT116**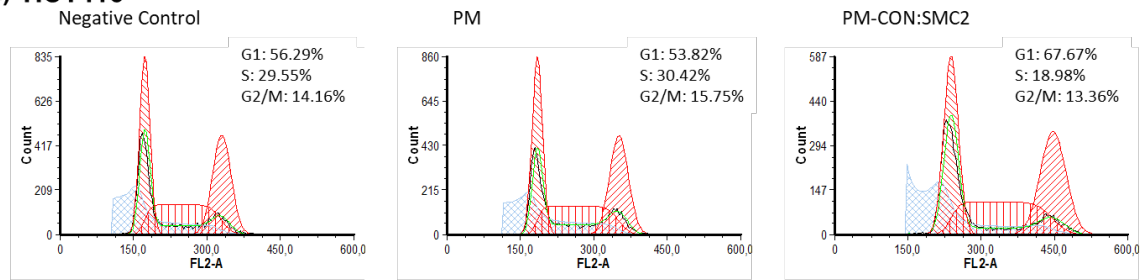

| HCT116      | % G1 $\pm$ SD      | % S $\pm$ SD       | % G2/M $\pm$ SD    | G2 / G1           |
|-------------|--------------------|--------------------|--------------------|-------------------|
| Control     | 56.291 $\pm$ 2.382 | 29.546 $\pm$ 1.205 | 14.163 $\pm$ 1.223 | 1.900 $\pm$ 0.010 |
| PM          | 53.824 $\pm$ 8.322 | 30.422 $\pm$ 7.600 | 15.754 $\pm$ 3.031 | 1.890 $\pm$ 0.031 |
| PM-CON:SMC2 | 67.667 $\pm$ 1.562 | 18.975 $\pm$ 1.212 | 13.358 $\pm$ 0.364 | 1.876 $\pm$ 0.005 |

**b) MDA-MB.231**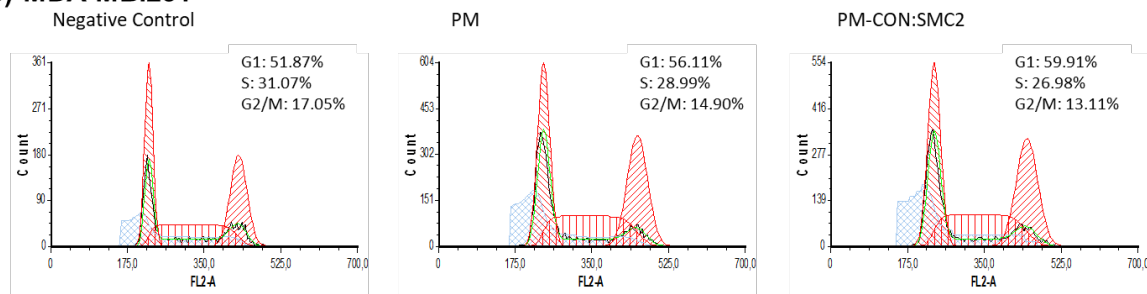

| MDA-MB.231  | % G1 $\pm$ SD      | % S $\pm$ SD       | % G2/M $\pm$ SD    | G2 / G1           |
|-------------|--------------------|--------------------|--------------------|-------------------|
| Control     | 51.866 $\pm$ 7.764 | 31.086 $\pm$ 5.203 | 17.047 $\pm$ 3.049 | 1.910 $\pm$ 0.009 |
| PM          | 56.111 $\pm$ 7.065 | 28.995 $\pm$ 6.389 | 14.895 $\pm$ 0.984 | 1.902 $\pm$ 0.005 |
| PM-CON:SMC2 | 59.913 $\pm$ 6.950 | 26.977 $\pm$ 6.519 | 13.110 $\pm$ 0.459 | 1.900 $\pm$ 0.011 |

**Figure S4: Representative cell cycle analysis of HCT116 colon cell line (a) and MDA-MB-231 breast cell line (b).** Plots of cell cycle fitting curves distribution. Below, quantification of the percentage of cells at distinct cell cycle phases: G1, S and G2/M. G2/G1 ratio was also determined.
